# Supplementary material for: MOOCs taken by educated few
Source: Springer Nature journal article supplement (doi:10.1038/503342a), 2013-11-19
Supplement: 41586_2013_BF503342a_MOESM1_ESM.pdf [file 41586_2013_BF503342a_MOESM1_ESM.pdf]

---

**Supplementary information to:  
Extend reach of online education**

*Full list of co-signatories to a Correspondence published in Nature 503, 342(2013);  
<http://dx.doi.org/10.1038/503342a>*

**Ezekiel J. Emanuel, Gayle Christensen, Andrew Steinmetz,  
Brandon Alcorn, Amy Bennett, Deirdre Woods** *University of  
Pennsylvania, Philadelphia, USA.*  
*vp-global@upenn.edu*
